# Supplementary material
Source: PubMed Central journal article supplement (PMC2373322)
Supplement: 0800408105_Supplemental_PDF.pdf [file 0800408105_Supplemental_PDF.pdf]

# Supporting Information

Paulsson *et al.* 10.1073/pnas.0800408105

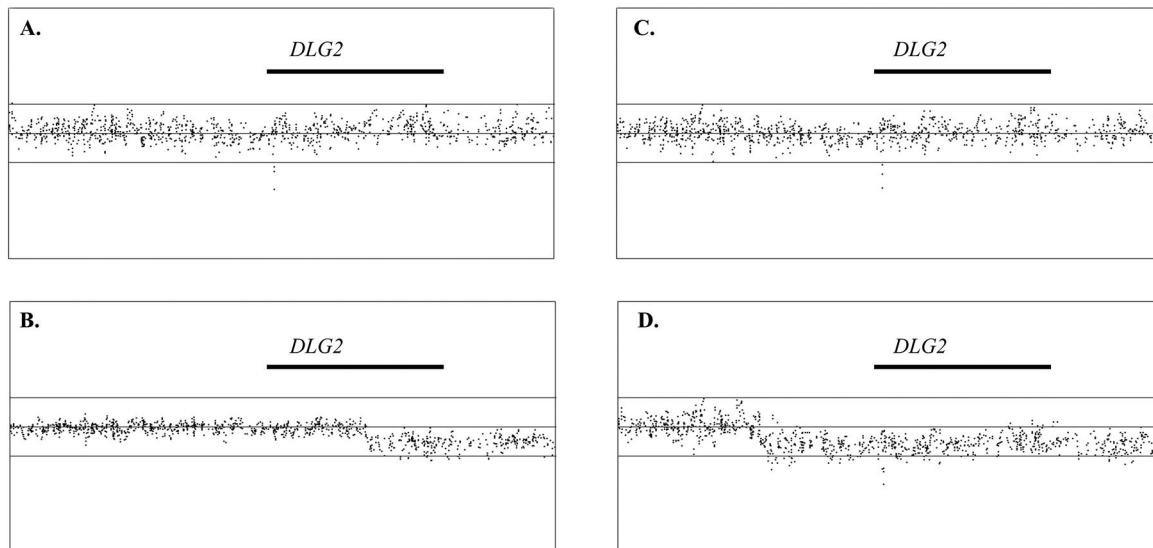

**Fig. S1.** SNP array analysis results from the 250K Nsp and the 250K Sty arrays showing deletions in the region 80,095,773–85,771,543 bp at 11q14.1, including the *DLG2* gene, in cases 36 (A), 20 (B), 22 (C), and 18 (D). Each dot represents the  $\log_2$  ratio of one SNP with a moving average of three SNPs. The top line represents a  $\log_2$  ratio of 1, the middle line a  $\log_2$  ratio of 0, and the lower line a  $\log_2$  ratio of  $-1$ . Homozygous deletions involving three SNPs are seen in A and C, whereas B and D display larger hemizygous deletions with different breakpoints. All three deleted SNPs in A and B showed low  $\log_2$  ratios without moving average being used; however, the  $\log_2$  ratio of the middle SNP was lowest, resulting in the deletion involving three SNPs also when a moving average of three was used.







Table S2. *CDKN2A (P16)* deletions detected in 45 adult ALL cases

| Start position*<br>(Mb) | End position*<br>(Mb) | Size Mb<br>(max Mb) <sup>†</sup> | Type | Including<br><i>CDKN2B</i><br>(P15) | Associated<br>change | Case | Comment                                       |
|-------------------------|-----------------------|----------------------------------|------|-------------------------------------|----------------------|------|-----------------------------------------------|
| 19.776217 (19.750153)   | 22.420804 (22.474016) | 2.644587 (2.723863)              | HoD  | Yes                                 | HeD                  | 37   |                                               |
| 21.836327 (21.823659)   | 21.978896 (21.981752) | 0.142569 (0.158093)              | HoD  | No                                  | pUPD                 | 36   |                                               |
| 21.880326 (21.859079)   | 22.088619 (22.093813) | 0.208293 (0.234734)              | HoD  | Yes                                 | pUPD                 | 39   |                                               |
| 21.047062 (21.045413)   | 22.742380 (22.747714) | 1.695318 (1.702301)              | HoD  | Yes                                 | HeD                  | 16   |                                               |
| 21.968443 (21.948524)   | 22.021005 (22.031998) | 0.052562 (0.083474)              | HoD  | Yes                                 | HeD                  | 2    |                                               |
| 21.968443 (21.948524)   | 21.999960 (22.007836) | 0.031517 (0.059312)              | HoD  | Yes                                 | HeD                  | 3    |                                               |
| 21.669152 (21.663608)   | 22.571260 (22.582589) | 0.902108 (0.918981)              | HoD  | Yes                                 | HeD                  | 15   |                                               |
| 21.899000 (21.880326)   | 21.978896 (21.988733) | 0.079896 (0.108407)              | HoD  | No                                  | HeD                  | 4    | <i>CDKN2B (P15)</i><br>hemizyously<br>deleted |
| 21.935605 (21.944953)   | 22.008781 (22.018801) | 0.073176 (0.073848)              | HoD  | Yes                                 | HeD                  | 27   |                                               |
| 21.823659 (21.818110)   | 22.152238 (22.158128) | 0.328579 (0.340018)              | HoD  | Yes                                 | HeD                  | 5    |                                               |
| 21.248474 (21.225216)   | 22.197037 (22.209365) | 0.948563 (0.984149)              | HoD  | Yes                                 | HeD                  | 23   |                                               |
| 21818110 (21797994)     | 25.577832 (25.581948) | 3.759722 (3.783954)              | HoD  | Yes                                 | HeD                  | 42   |                                               |
| 19.463612 (19.458614)   | 22.420804 (22.474016) | 2.957192 (3.015402)              | HoD  | Yes                                 | pUPD                 | 19   |                                               |
| 21.899000 (21.880326)   | 21.995330 (21.999960) | 0.09633 (0.119634)               | HoD  | Yes                                 | HeD                  | 8    |                                               |
| 21.823659 (21.818110)   | 21.981752 (21.988733) | 0.158093 (0.170623)              | HoD  | No                                  | pUPD                 | 32   |                                               |
| 21.763167 (21.757404)   | 21.999960 (22.007836) | 0.236793 (0.250432)              | HoD  | Yes                                 | pUPD                 | 10   |                                               |
| 20.833841 (20.824837)   | 23.413785 (23.430715) | 2.579944 (2.605878)              | HoD  | Yes                                 | HeD                  | 38   |                                               |
| 0.030910 (0)            | 45.028875 (66.266293) | 44.997965 (66.266293)            | HeD  | Yes                                 | N/A                  | 17   |                                               |
| 20.629801 (20.615875)   | 45.028875 (66.266293) | 24.399074 (45.650418)            | HeD  | Yes                                 | N/A                  | 41   |                                               |
| 21.225442 (21.218285)   | 22.402948 (22.420804) | 1.177506 (1.202519)              | HeD  | Yes                                 | N/A                  | 24   |                                               |
| 21.248474 (21.228127)   | 22.209365 (22.227321) | 0.960891 (0.981238)              | HeD  | Yes                                 | N/A                  | 26   |                                               |

ALL, acute lymphoblastic leukemia; Mb, megabases; HoD, homozygous deletion; HeD, hemizygous deletion; N/A, not applicable.

\*Positions are given for first abnormal SNP and in brackets for first normal neighboring SNP. All positions are according to NCBI Build 36.

<sup>†</sup>Distance between first and last abnormal SNPs, in parentheses between normal neighboring SNPs.



**Table S4. Gains of 1q detected in 45 adult ALL cases**

| Start position,<br>Mb (max Mb)* | End position<br>Mb (max Mb)* | Size Mb<br>(max Mb) <sup>†</sup> | Case | Expected<br>cytogenetic<br>aberration | Comment                   |
|---------------------------------|------------------------------|----------------------------------|------|---------------------------------------|---------------------------|
| 0.742429 (0.775852)             | 247.110269 (247.110269)      | 246.367840 (246.334417)          | 11   | +1                                    | Trisomy 1                 |
| 141.510591 (120.953314)         | 146.292286 (147.216118)      | 4.781695 (26.262804)             | 16   | dup(1)(q12q21.1)                      | Possibly CNP <sup>‡</sup> |
| 141.510591 (120.953314)         | 247.110269 (247.110269)      | 105.599678 (126.156955)          | 22   | dup(1)(q12q44)                        | All of 1q                 |
| 141.510591 (120.953314)         | 247.110269 (247.110269)      | 105.599678 (126.156955)          | 1    | dup(1)(q12q44)                        | All of 1q                 |
| 141.510591 (120.953314)         | 215.402418 (215.407074)      | 73.891827 (94.453760)            | 18   | dup(1)(q12q41)                        | Three consecutive gains   |
| 215.516892 (215.509261)         | 216.223617 (216.241657)      | 0.706725 (0.732396)              | 18   | dup(1)(q41q41)                        | Three consecutive gains   |
| 216.555832 (216.241657)         | 247.110269 (247.110269)      | 30.554437 (30.868612)            | 18   | dup(1)(q41q44)                        | Three consecutive gains   |
| 141.510591 (120.953314)         | 195.393272 (195.482842)      | 53.882681 (74.529528)            | 13   | dup(1)(q12q31.3)                      |                           |
| 152.959805 (152.950730)         | 154.321968 (154.326774)      | 1.362163 (1.376044)              | 17   | dup(1)(q22q22)                        | Minimally gained region   |

ALL, acute lymphoblastic leukemia; Mb, megabases; CNP, copy number polymorphism.

\*Positions are given for first abnormal SNP and in brackets for first normal neighbouring SNP. All positions are according to NCBI Build 36.

<sup>†</sup>Distance between first and last abnormal SNPs, in brackets between normal neighbouring SNPs.

<sup>‡</sup>Overlapping with reported known CNP (Database of Genomic Variants; <http://projects.tcag.ca/variation/>).

**Table S5. Minimally deleted 6q regions involved in more than two adult ALL cases**

| Start position* (Mb) | End position* (Mb) | Cases             | Genes in region                       | Comment                   |
|----------------------|--------------------|-------------------|---------------------------------------|---------------------------|
| 77.496587            | 77.497656          | 5, 11, 17, 18, 29 | <i>MYO6</i>                           | Possible CNP <sup>†</sup> |
| 79.325534            | 89.324095          | 5, 17, 41         | ≈40 genes                             |                           |
| 103.242724           | 103.537117         | 5, 17, 34, 45     | No genes                              |                           |
| 108.863061           | 109.313107         | 5, 17, 18, 34, 45 | <i>LACE1, FOXO3, ARMC2</i>            |                           |
| 109.328539           | 109.429247         | 5, 17, 34, 45     | <i>ARMC2, SESN1</i>                   |                           |
| 109.441151           | 109.610493         | 5, 17, 18, 34, 45 | <i>SESN1, KIF6</i>                    |                           |
| 111.647065           | 112.403213         | 5, 17, 18, 34, 45 | <i>KIAA1919, REV3L, TRAF3IP2, FYN</i> |                           |

ALL, acute lymphoblastic leukemia; Mb, megabases; CNP, copy number polymorphism.

\*Positions are given for first abnormal SNP. All positions are according to NCBI Build 36.

<sup>†</sup>Overlapping with reported known CNP (Database of Genomic Variants; <http://projects.tcag.ca/variation/>).

## Other Supporting Information Files

[Dataset S1](#)
